# Supplementary material for: Self-assembly of chemically modified graphene sheets in an external magnetic field
Source: Royal Society of Chemistry journal article supplement (doi:10.1039/c9ra01807g), 2019-01-01
Supplement: c9ra01807g1.pdf [file c9ra01807g1.pdf]

## Supplementary Information

### **Self-assembly of chemically modified graphene sheets in an external magnetic field**

Mingqiong Tong, Jianda Cao, Xiaoping Chen, Huanxia Zhang\*, Wen Wu\*, and Hui Ma\*

*China-Australia Institute for Advanced Materials and Manufacturing, College of Material and Textile Engineering, Jiaxing University, Jiaxing, 314001, China*

\*Corresponding author. Address: College of Material and Textile Engineering, Jiaxing University, Jiaxing, 314001, China. Tel: +86-573-83641175; Fax: +86-573-83640322.

E-mail address: mahone1136@163.com (Hui Ma); 13967327877@163.com (Wen Wu); zhanghuanxia818@163.com (Huanxia Zhang).

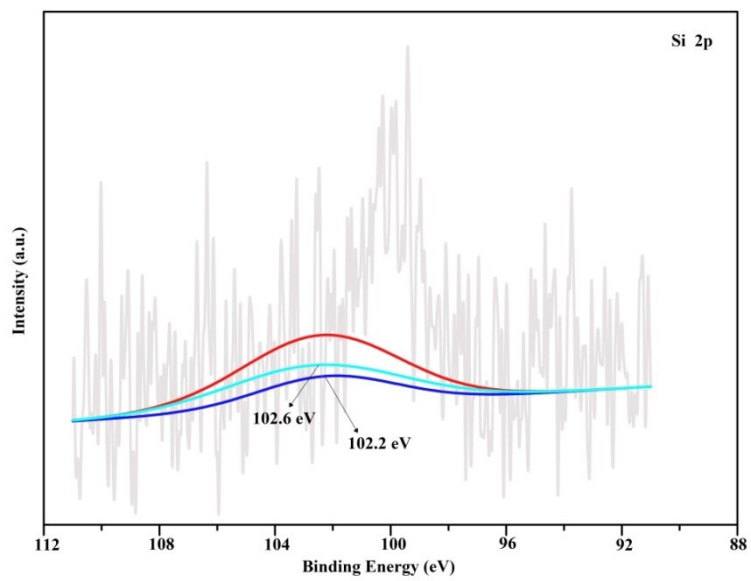

Fig. S1 Si 2p XPS spectra of GOF dispersions.
